# Supplementary material for: Nanostructured Metal Oxide Sensors for Antibiotic Monitoring in Mineral and River Water
Source: MDPI journal article supplement (doi:10.3390/nano12111858), 2022-05-29
Supplement: s1 [file s1]

Supplementary Data

# Nanostructured Metal Oxide Sensors for Antibiotic Monitoring in Mineral and River Water

Cátia Magro <sup>1,2,\*</sup>, Tiago Moura <sup>2</sup>, Joana Dionísio <sup>1</sup>, Paulo A. Ribeiro <sup>3</sup>, Maria Raposo <sup>3</sup> and Susana Sérgio <sup>3,\*</sup>

<sup>1</sup> School for International Training, World Learning Inc., Brattleboro, VT 05302, USA; joana.dionisio@sit.edu  
<sup>2</sup> Department of Physics, NOVA School of Science and Technology, NOVA University Lisbon, 2829-516 Caparica, Portugal; ta.moura@campus.fct.unl.pt  
<sup>3</sup> Laboratory of Instrumentation, Biomedical Engineering and Radiation Physics (LIBPhys-UNL), Department of Physics, NOVA School of Science and Technology, NOVA University Lisbon, 2829-516 Caparica, Portugal; pfr@fct.unl.pt (P.A.R.); mfr@fct.unl.pt (M.R.)  
\* Correspondence: catia.magro@sit.edu (C.M.); susana.serio@fct.unl.pt (S.S.)

S1. Reproducibility Measurements of Figures S1–S6.

**Table S1.** Normalized Impedance data ( $\Omega$ ) reproducibility of the TiO<sub>2</sub> based sensors devices produced with 100% O<sub>2</sub>, when immersed in MW and RW at different AZI, CLA and ERY concentrations.

| MW AZI              |          |          |         |                    | MW CLARI            |          |          |         |                    | MW ERIT             |              |             |         |                    |
|---------------------|----------|----------|---------|--------------------|---------------------|----------|----------|---------|--------------------|---------------------|--------------|-------------|---------|--------------------|
| Concentrations      | Sensor 1 | Sensor 2 | Average | Standard Deviation | Concentrations      | Sensor 1 | Sensor 2 | Average | Standard Deviation | Concentrations      | Sensor 1     | Sensor 2    | Average | Standard Deviation |
| 10 <sup>−15</sup> M | 0.0106   | 0.0039   | 0.0072  | 0.0034             | 10 <sup>−15</sup> M | 0.0041   | 0.0056   | 0.0048  | 0.0008             | 10 <sup>−15</sup> M | −0.007121814 | 0.003715304 | −0.0017 | 0.0054             |
| 10 <sup>−14</sup> M | 0.0200   | 0.0073   | 0.0137  | 0.0063             | 10 <sup>−14</sup> M | 0.0070   | 0.0106   | 0.0088  | 0.0018             | 10 <sup>−14</sup> M | −0.010836905 | 0.008461669 | −0.0012 | 0.0096             |
| 10 <sup>−13</sup> M | 0.0254   | 0.0094   | 0.0174  | 0.0080             | 10 <sup>−13</sup> M | 0.0091   | 0.0133   | 0.0112  | 0.0021             | 10 <sup>−13</sup> M | −0.014426082 | 0.011704099 | −0.0014 | 0.0131             |
| 10 <sup>−12</sup> M | 0.0300   | 0.0117   | 0.0208  | 0.0091             | 10 <sup>−12</sup> M | 0.0118   | 0.0155   | 0.0137  | 0.0018             | 10 <sup>−12</sup> M | −0.017404262 | 0.013934241 | −0.0017 | 0.0157             |
| 10 <sup>−11</sup> M | 0.0390   | 0.0150   | 0.0270  | 0.0120             | 10 <sup>−11</sup> M | 0.0139   | 0.0234   | 0.0187  | 0.0048             | 10 <sup>−11</sup> M | −0.017649471 | 0.018165389 | 0.0003  | 0.0179             |
| 10 <sup>−10</sup> M | 0.0432   | 0.0173   | 0.0303  | 0.0129             | 10 <sup>−10</sup> M | 0.0152   | 0.0285   | 0.0219  | 0.0067             | 10 <sup>−10</sup> M | −0.017293276 | 0.021319272 | 0.0020  | 0.0193             |
| 10 <sup>−9</sup> M  | 0.0484   | 0.0187   | 0.0336  | 0.0148             | 10 <sup>−9</sup> M  | 0.0158   | 0.0213   | 0.0185  | 0.0028             | 10 <sup>−9</sup> M  | −0.02298693  | 0.023543261 | 0.0003  | 0.0233             |
| 10 <sup>−8</sup> M  | 0.0547   | 0.0207   | 0.0377  | 0.0170             | 10 <sup>−8</sup> M  | 0.0159   | 0.0230   | 0.0194  | 0.0035             | 10 <sup>−8</sup> M  | −0.020006048 | 0.02746048  | 0.0037  | 0.0237             |

|                    |        |        |        |        |                    |        |        |        |        |                    |              |             |        |        |
|--------------------|--------|--------|--------|--------|--------------------|--------|--------|--------|--------|--------------------|--------------|-------------|--------|--------|
| 10 <sup>−7</sup> M | 0.0591 | 0.0218 | 0.0404 | 0.0187 | 10 <sup>−7</sup> M | 0.0181 | 0.0546 | 0.0364 | 0.0182 | 10 <sup>−7</sup> M | −0.021724946 | 0.030946648 | 0.0046 | 0.0263 |
| 10 <sup>−6</sup> M | 0.0643 | 0.0244 | 0.0443 | 0.0200 | 10 <sup>−6</sup> M | 0.0194 | 0.0746 | 0.0470 | 0.0276 | 10 <sup>−6</sup> M | −0.021508108 | 0.03403566  | 0.0063 | 0.0278 |
| 10 <sup>−5</sup> M | 0.0706 | 0.0271 | 0.0489 | 0.0217 | 10 <sup>−5</sup> M | 0.0192 | 0.0321 | 0.0256 | 0.0065 | 10 <sup>−5</sup> M | −0.01754882  | 0.039208488 | 0.0108 | 0.0284 |

|                     |          |          |         |                    |                     |          |          |         |                    |                     |          |          |         |                    |
|---------------------|----------|----------|---------|--------------------|---------------------|----------|----------|---------|--------------------|---------------------|----------|----------|---------|--------------------|
| RW AZI              |          |          |         |                    | RW CLARI            |          |          |         |                    | RW ERIT             |          |          |         |                    |
| Concentrations      | Sensor 1 | Sensor 2 | Average | Standard Deviation | Concentrations      | Sensor 1 | Sensor 2 | Average | Standard Deviation | Concentrations      | Sensor 1 | Sensor 2 | Average | Standard Deviation |
| 10 <sup>−15</sup> M | −0.0126  | −0.0007  | −0.0066 | 0.0060             | 10 <sup>−15</sup> M | −0.0383  | −0.0160  | −0.0272 | 0.0112             | 10 <sup>−15</sup> M | 0.0041   | 0.0120   | 0.0080  | 0.0039             |
| 10 <sup>−14</sup> M | −0.0306  | −0.0023  | −0.0165 | 0.0141             | 10 <sup>−14</sup> M | −0.0576  | −0.0276  | −0.0426 | 0.0150             | 10 <sup>−14</sup> M | 0.0043   | 0.0204   | 0.0123  | 0.0081             |
| 10 <sup>−13</sup> M | −0.0529  | −0.0029  | −0.0279 | 0.0250             | 10 <sup>−13</sup> M | −0.0732  | −0.0371  | −0.0551 | 0.0180             | 10 <sup>−13</sup> M | 0.0094   | 0.0277   | 0.0186  | 0.0091             |
| 10 <sup>−12</sup> M | −0.0773  | −0.0040  | −0.0406 | 0.0367             | 10 <sup>−12</sup> M | −0.0866  | −0.0455  | −0.0661 | 0.0206             | 10 <sup>−12</sup> M | 0.0107   | 0.0356   | 0.0231  | 0.0124             |
| 10 <sup>−11</sup> M | −0.0971  | −0.0048  | −0.0510 | 0.0462             | 10 <sup>−11</sup> M | −0.1125  | −0.0588  | −0.0857 | 0.0269             | 10 <sup>−11</sup> M | 0.0142   | 0.0477   | 0.0310  | 0.0168             |
| 10 <sup>−10</sup> M | −0.1205  | −0.0066  | −0.0635 | 0.0570             | 10 <sup>−10</sup> M | −0.1251  | −0.0673  | −0.0962 | 0.0289             | 10 <sup>−10</sup> M | 0.0180   | 0.0547   | 0.0363  | 0.0183             |
| 10 <sup>−9</sup> M  | −0.1480  | −0.0092  | −0.0786 | 0.0694             | 10 <sup>−9</sup> M  | −0.1415  | −0.0764  | −0.1090 | 0.0326             | 10 <sup>−9</sup> M  | 0.0212   | 0.0609   | 0.0411  | 0.0198             |
| 10 <sup>−8</sup> M  | −0.1767  | −0.0098  | −0.0932 | 0.0835             | 10 <sup>−8</sup> M  | −0.1581  | −0.0862  | −0.1221 | 0.0360             | 10 <sup>−8</sup> M  | 0.0234   | 0.0698   | 0.0466  | 0.0232             |
| 10 <sup>−7</sup> M  | −0.2013  | −0.0116  | −0.1065 | 0.0948             | 10 <sup>−7</sup> M  | −0.1784  | −0.0956  | −0.1370 | 0.0414             | 10 <sup>−7</sup> M  | 0.0274   | 0.0767   | 0.0520  | 0.0246             |
| 10 <sup>−6</sup> M  | −0.2252  | −0.0150  | −0.1201 | 0.1051             | 10 <sup>−6</sup> M  | −0.1943  | −0.1100  | −0.1521 | 0.0422             | 10 <sup>−6</sup> M  | 0.0308   | 0.0846   | 0.0577  | 0.0269             |
| 10 <sup>−5</sup> M  | −0.2454  | −0.0155  | −0.1305 | 0.1150             | 10 <sup>−5</sup> M  | −0.2144  | −0.1140  | −0.1642 | 0.0502             | 10 <sup>−5</sup> M  | 0.0325   | 0.0887   | 0.0606  | 0.0281             |

**Table S2.** Normalized Impedance data ( $\Omega$ ) reproducibility of the TiO<sub>2</sub> based sensors devices produced with 50% O<sub>2</sub>, when immersed in MW and RW at different AZI, CLA and ERY concentrations.

|                     |          |          |         |                    |                     |          |          |         |                    |                     |              |              |         |                    |
|---------------------|----------|----------|---------|--------------------|---------------------|----------|----------|---------|--------------------|---------------------|--------------|--------------|---------|--------------------|
| MW AZI              |          |          |         |                    | MW CLARI            |          |          |         |                    | MW ERIT             |              |              |         |                    |
| Concentrations      | Sensor 1 | Sensor 2 | Average | Standard Deviation | Concentrations      | Sensor 1 | Sensor 2 | Average | Standard Deviation | Concentrations      | Sensor 1     | Sensor 2     | Average | Standard Deviation |
| 10 <sup>−15</sup> M | −0.5355  | −0.2953  | −0.4154 | 0.1201             | 10 <sup>−15</sup> M | −0.3162  | −0.2142  | −0.2652 | 0.0510             | 10 <sup>−15</sup> M | −0.298638445 | −0.289563448 | −0.2941 | 0.0045             |
| 10 <sup>−14</sup> M | −0.5394  | −0.3480  | −0.4437 | 0.0957             | 10 <sup>−14</sup> M | −0.3885  | −0.3214  | −0.3550 | 0.0336             | 10 <sup>−14</sup> M | −0.375538138 | −0.388109988 | −0.3818 | 0.0063             |
| 10 <sup>−13</sup> M | −0.5986  | −0.4575  | −0.5280 | 0.0705             | 10 <sup>−13</sup> M | −0.4492  | −0.4107  | −0.4299 | 0.0193             | 10 <sup>−13</sup> M | −0.481711642 | −0.452344157 | −0.4670 | 0.0147             |
| 10 <sup>−12</sup> M | −0.6275  | −0.4443  | −0.5359 | 0.0916             | 10 <sup>−12</sup> M | −0.4677  | −0.4700  | −0.4688 | 0.0012             | 10 <sup>−12</sup> M | −0.533672326 | −0.49143296  | −0.5126 | 0.0211             |

|              |         |         |         |        |              |         |         |         |        |              |              |              |         |        |
|--------------|---------|---------|---------|--------|--------------|---------|---------|---------|--------|--------------|--------------|--------------|---------|--------|
| $10^{-11}$ M | −0.6473 | −0.4753 | −0.5613 | 0.0860 | $10^{-11}$ M | −0.4981 | −0.5585 | −0.5283 | 0.0302 | $10^{-11}$ M | −0.543996559 | −0.514074815 | −0.5290 | 0.0150 |
| $10^{-10}$ M | −0.6793 | −0.5020 | −0.5907 | 0.0887 | $10^{-10}$ M | −0.5452 | −0.6201 | −0.5827 | 0.0375 | $10^{-10}$ M | −0.580831031 | −0.526168915 | −0.5535 | 0.0273 |
| $10^{-9}$ M  | −0.7241 | −0.5479 | −0.6360 | 0.0881 | $10^{-9}$ M  | −0.5430 | −0.6624 | −0.6027 | 0.0597 | $10^{-9}$ M  | −0.612072783 | −0.55132712  | −0.5817 | 0.0304 |
| $10^{-8}$ M  | −0.7270 | −0.5337 | −0.6304 | 0.0967 | $10^{-8}$ M  | −0.5660 | −0.6192 | −0.5926 | 0.0266 | $10^{-8}$ M  | −0.620737614 | −0.566044259 | −0.5934 | 0.0273 |
| $10^{-7}$ M  | −0.7520 | −0.5442 | −0.6481 | 0.1039 | $10^{-7}$ M  | −0.6192 | −0.6621 | −0.6406 | 0.0215 | $10^{-7}$ M  | −0.62728041  | −0.567301508 | −0.5973 | 0.0300 |
| $10^{-6}$ M  | −0.7631 | −0.5455 | −0.6543 | 0.1088 | $10^{-6}$ M  | −0.5851 | −0.6835 | −0.6343 | 0.0492 | $10^{-6}$ M  | −0.653309718 | −0.604771693 | −0.6290 | 0.0243 |
| $10^{-5}$ M  | −0.7644 | −0.5480 | −0.6562 | 0.1082 | $10^{-5}$ M  | −0.6135 | −0.7013 | −0.6574 | 0.0439 | $10^{-5}$ M  | −0.669442648 | −0.586878472 | −0.6282 | 0.0413 |

| RW AZI         |          |          |         |                    | RW CLARI       |          |          |         |                    | RW ERIT        |          |          |         |                    |
|----------------|----------|----------|---------|--------------------|----------------|----------|----------|---------|--------------------|----------------|----------|----------|---------|--------------------|
| Concentrations | Sensor 1 | Sensor 2 | Average | Standard Deviation | Concentrations | Sensor 1 | Sensor 2 | Average | Standard Deviation | Concentrations | Sensor 1 | Sensor 2 | Average | Standard Deviation |
| $10^{-15}$ M   | −0.5100  | −0.4319  | −0.4709 | 0.0390             | $10^{-15}$ M   | −0.0441  | −0.0396  | −0.0419 | 0.0023             | $10^{-15}$ M   | −0.4258  | −0.4472  | −0.4365 | 0.0107             |
| $10^{-14}$ M   | −0.6604  | −0.4829  | −0.5716 | 0.0887             | $10^{-14}$ M   | −0.0575  | −0.0480  | −0.0528 | 0.0048             | $10^{-14}$ M   | −0.6010  | −0.5913  | −0.5962 | 0.0048             |
| $10^{-13}$ M   | −0.7097  | −0.5731  | −0.6414 | 0.0683             | $10^{-13}$ M   | −0.0603  | −0.0531  | −0.0567 | 0.0036             | $10^{-13}$ M   | −0.6495  | −0.7111  | −0.6803 | 0.0308             |
| $10^{-12}$ M   | −0.7579  | −0.6480  | −0.7030 | 0.0550             | $10^{-12}$ M   | −0.0589  | −0.0568  | −0.0578 | 0.0010             | $10^{-12}$ M   | −0.6773  | −0.7205  | −0.6989 | 0.0216             |
| $10^{-11}$ M   | −0.7888  | −0.6509  | −0.7199 | 0.0690             | $10^{-11}$ M   | −0.0590  | −0.0562  | −0.0576 | 0.0014             | $10^{-11}$ M   | −0.6977  | −0.7394  | −0.7186 | 0.0208             |
| $10^{-10}$ M   | −0.7884  | −0.6783  | −0.7334 | 0.0550             | $10^{-10}$ M   | −0.0598  | −0.0566  | −0.0582 | 0.0016             | $10^{-10}$ M   | −0.7129  | −0.7539  | −0.7334 | 0.0205             |
| $10^{-9}$ M    | −0.8004  | −0.6726  | −0.7365 | 0.0639             | $10^{-9}$ M    | −0.0632  | −0.0595  | −0.0614 | 0.0018             | $10^{-9}$ M    | −0.7255  | −0.7654  | −0.7455 | 0.0200             |
| $10^{-8}$ M    | −0.8049  | −0.6930  | −0.7490 | 0.0560             | $10^{-8}$ M    | −0.0642  | −0.0596  | −0.0619 | 0.0023             | $10^{-8}$ M    | −0.7361  | −0.7697  | −0.7529 | 0.0168             |
| $10^{-7}$ M    | −0.8108  | −0.6932  | −0.7520 | 0.0588             | $10^{-7}$ M    | −0.0658  | −0.0603  | −0.0630 | 0.0027             | $10^{-7}$ M    | −0.7415  | −0.7731  | −0.7573 | 0.0158             |
| $10^{-6}$ M    | −0.8103  | −0.7073  | −0.7588 | 0.0515             | $10^{-6}$ M    | −0.0675  | −0.0613  | −0.0644 | 0.0031             | $10^{-6}$ M    | −0.7577  | −0.7777  | −0.7677 | 0.0100             |
| $10^{-5}$ M    | −0.8150  | −0.7093  | −0.7622 | 0.0529             | $10^{-5}$ M    | −0.0689  | −0.0603  | −0.0646 | 0.0043             | $10^{-5}$ M    | −0.7615  | −0.7819  | −0.7717 | 0.0102             |

**Table S3.** Normalized Impedance data ( $\Omega$ ) reproducibility of the ZnO based sensors devices produced with 100% O<sub>2</sub>, when immersed in MW and RW at different AZI, CLA and ERY concentrations.

| MW AZI              |          |          |         |                    | MW CLARI            |          |          |         |                    | MW ERIT             |              |              |         |                    |
|---------------------|----------|----------|---------|--------------------|---------------------|----------|----------|---------|--------------------|---------------------|--------------|--------------|---------|--------------------|
| Concentrations      | Sensor 1 | Sensor 2 | Average | Standard Deviation | Concentrations      | Sensor 1 | Sensor 2 | Average | Standard Deviation | Concentrations      | Sensor 1     | Sensor 2     | Average | Standard Deviation |
| 10 <sup>-15</sup> M | -0.0932  | 0.3406   | 0.1237  | 0.2169             | 10 <sup>-15</sup> M | 0.2356   | 1.2696   | 0.7526  | 0.5170             | 10 <sup>-15</sup> M | -0.015635615 | 0.038991603  | 0.0117  | 0.0273             |
| 10 <sup>-14</sup> M | -0.1248  | 0.4380   | 0.1566  | 0.2814             | 10 <sup>-14</sup> M | 0.5043   | 3.0169   | 1.7606  | 1.2563             | 10 <sup>-14</sup> M | -0.100054729 | 0.022152197  | -0.0390 | 0.0611             |
| 10 <sup>-13</sup> M | -0.2085  | 0.4313   | 0.1114  | 0.3199             | 10 <sup>-13</sup> M | 0.7534   | 5.6357   | 3.1946  | 2.4411             | 10 <sup>-13</sup> M | -0.175895981 | -0.049136708 | -0.1125 | 0.0634             |
| 10 <sup>-12</sup> M | -0.2404  | 0.3799   | 0.0697  | 0.3101             | 10 <sup>-12</sup> M | 0.9321   | 8.8369   | 4.8845  | 3.9524             | 10 <sup>-12</sup> M | -0.21358818  | -0.035794482 | -0.1247 | 0.0889             |
| 10 <sup>-11</sup> M | -0.2473  | 0.3872   | 0.0699  | 0.3172             | 10 <sup>-11</sup> M | 1.1118   | 12.6809  | 6.8964  | 5.7846             | 10 <sup>-11</sup> M | -0.236529308 | -0.021220127 | -0.1289 | 0.1077             |
| 10 <sup>-10</sup> M | -0.2714  | 0.3721   | 0.0503  | 0.3217             | 10 <sup>-10</sup> M | 1.3347   | 17.8506  | 9.5926  | 8.2579             | 10 <sup>-10</sup> M | -0.271723587 | -0.064155612 | -0.1679 | 0.1038             |
| 10 <sup>-9</sup> M  | -0.3060  | 0.3234   | 0.0087  | 0.3147             | 10 <sup>-9</sup> M  | 1.5415   | 23.7623  | 12.6519 | 11.1104            | 10 <sup>-9</sup> M  | -0.281178095 | -0.076722196 | -0.1790 | 0.1022             |
| 10 <sup>-8</sup> M  | -0.3372  | 0.2931   | -0.0220 | 0.3151             | 10 <sup>-8</sup> M  | 1.7610   | 30.4630  | 16.1120 | 14.3510            | 10 <sup>-8</sup> M  | -0.323372253 | -0.097834268 | -0.2106 | 0.1128             |
| 10 <sup>-7</sup> M  | -0.3450  | 0.2608   | -0.0421 | 0.3029             | 10 <sup>-7</sup> M  | 1.9612   | 36.7914  | 19.3763 | 17.4151            | 10 <sup>-7</sup> M  | -0.341931737 | -0.157576559 | -0.2498 | 0.0922             |
| 10 <sup>-6</sup> M  | -0.3723  | 0.2018   | -0.0853 | 0.2870             | 10 <sup>-6</sup> M  | 2.1190   | 47.1884  | 24.6537 | 22.5347            | 10 <sup>-6</sup> M  | -0.365188325 | -0.144436119 | -0.2548 | 0.1104             |
| 10 <sup>-5</sup> M  | -0.3768  | 0.2149   | -0.0809 | 0.2959             | 10 <sup>-5</sup> M  | 2.3429   | 53.0738  | 27.7083 | 25.3654            | 10 <sup>-5</sup> M  | -0.391553519 | -0.178290771 | -0.2849 | 0.1066             |

  

| RW AZI              |          |          |         |                    | RW CLARI            |          |          |         |                    | RW ERIT             |          |          |         |                    |
|---------------------|----------|----------|---------|--------------------|---------------------|----------|----------|---------|--------------------|---------------------|----------|----------|---------|--------------------|
| Concentrations      | Sensor 1 | Sensor 2 | Average | Standard Deviation | Concentrations      | Sensor 1 | Sensor 2 | Average | Standard Deviation | Concentrations      | Sensor 1 | Sensor 2 | Average | Standard Deviation |
| 10 <sup>-15</sup> M | -0.2076  | -0.1596  | -0.1836 | 0.0240             | 10 <sup>-15</sup> M | 0.0270   | -0.1053  | -0.0392 | 0.0662             | 10 <sup>-15</sup> M | -0.0106  | -0.0199  | -0.0152 | 0.0046             |
| 10 <sup>-14</sup> M | -0.2727  | -0.2153  | -0.2440 | 0.0287             | 10 <sup>-14</sup> M | -0.0222  | -0.1742  | -0.0982 | 0.0760             | 10 <sup>-14</sup> M | -0.0168  | -0.0306  | -0.0237 | 0.0069             |
| 10 <sup>-13</sup> M | -0.3113  | -0.2844  | -0.2979 | 0.0134             | 10 <sup>-13</sup> M | -0.0678  | -0.2171  | -0.1425 | 0.0746             | 10 <sup>-13</sup> M | -0.0196  | -0.0365  | -0.0280 | 0.0084             |
| 10 <sup>-12</sup> M | -0.3346  | -0.3097  | -0.3222 | 0.0124             | 10 <sup>-12</sup> M | -0.1209  | -0.2542  | -0.1876 | 0.0666             | 10 <sup>-12</sup> M | -0.0268  | -0.0429  | -0.0348 | 0.0080             |
| 10 <sup>-11</sup> M | -0.3527  | -0.3283  | -0.3405 | 0.0122             | 10 <sup>-11</sup> M | -0.1415  | -0.2771  | -0.2093 | 0.0678             | 10 <sup>-11</sup> M | -0.0310  | -0.0629  | -0.0469 | 0.0160             |
| 10 <sup>-10</sup> M | -0.3658  | -0.3463  | -0.3561 | 0.0097             | 10 <sup>-10</sup> M | -0.2003  | -0.2979  | -0.2491 | 0.0488             | 10 <sup>-10</sup> M | -0.0347  | -0.0593  | -0.0470 | 0.0123             |
| 10 <sup>-9</sup> M  | -0.3869  | -0.3613  | -0.3741 | 0.0128             | 10 <sup>-9</sup> M  | -0.2159  | -0.3188  | -0.2674 | 0.0514             | 10 <sup>-9</sup> M  | -0.0381  | -0.0601  | -0.0491 | 0.0110             |

|             |         |         |         |        |             |         |         |         |        |             |         |         |         |        |
|-------------|---------|---------|---------|--------|-------------|---------|---------|---------|--------|-------------|---------|---------|---------|--------|
| $10^{-8}$ M | −0.3907 | −0.3726 | −0.3817 | 0.0090 | $10^{-8}$ M | −0.2211 | −0.3363 | −0.2787 | 0.0576 | $10^{-8}$ M | −0.0397 | −0.0644 | −0.0521 | 0.0123 |
| $10^{-7}$ M | −0.4047 | −0.3869 | −0.3958 | 0.0089 | $10^{-7}$ M | −0.2422 | −0.3592 | −0.3007 | 0.0585 | $10^{-7}$ M | −0.0429 | −0.0735 | −0.0582 | 0.0153 |
| $10^{-6}$ M | −0.4097 | −0.4065 | −0.4081 | 0.0016 | $10^{-6}$ M | −0.2646 | −0.3770 | −0.3208 | 0.0562 | $10^{-6}$ M | −0.0416 | −0.0725 | −0.0571 | 0.0155 |
| $10^{-5}$ M | −0.4167 | −0.4264 | −0.4215 | 0.0049 | $10^{-5}$ M | −0.2740 | −0.3916 | −0.3328 | 0.0588 | $10^{-5}$ M | −0.0446 | −0.0778 | −0.0612 | 0.0166 |

**Table S4.** Normalized Impedance data ( $\Omega$ ) reproducibility of the ZnO based sensors devices produced with 50% O<sub>2</sub>, when immersed in MW and RW at different AZI, CLA and ERY concentrations.

| MW AZI         |          |          |         |                    | MW CLARI       |          |          |         |                    | MW ERIT         |          |          |         |                    |
|----------------|----------|----------|---------|--------------------|----------------|----------|----------|---------|--------------------|-----------------|----------|----------|---------|--------------------|
| Concentrations | Sensor 1 | Sensor 2 | Average | Standard Deviation | Concentrations | Sensor 1 | Sensor 2 | Average | Standard Deviation | Concentration s | Sensor 1 | Sensor 2 | Average | Standard Deviation |
| $10^{-15}$ M   | 0.0117   | −0.0077  | 0.0020  | 0.0097             | $10^{-15}$ M   | 0.0108   | 0.0040   | 0.0074  | 0.0034             | $10^{-15}$ M    | 0.0418   | 0.0171   | 0.0295  | 0.0123             |
| $10^{-14}$ M   | 0.0276   | −0.0084  | 0.0096  | 0.0180             | $10^{-14}$ M   | 0.0277   | 0.0126   | 0.0201  | 0.0075             | $10^{-14}$ M    | 0.1028   | 0.0544   | 0.0786  | 0.0242             |
| $10^{-13}$ M   | 0.0443   | −0.0083  | 0.0180  | 0.0263             | $10^{-13}$ M   | 0.0412   | 0.0224   | 0.0318  | 0.0094             | $10^{-13}$ M    | 0.1482   | 0.0806   | 0.1144  | 0.0338             |
| $10^{-12}$ M   | 0.0555   | −0.0086  | 0.0235  | 0.0320             | $10^{-12}$ M   | 0.0531   | 0.0304   | 0.0418  | 0.0113             | $10^{-12}$ M    | 0.1872   | 0.1059   | 0.1465  | 0.0407             |
| $10^{-11}$ M   | 0.0671   | −0.0071  | 0.0300  | 0.0371             | $10^{-11}$ M   | 0.0629   | 0.0392   | 0.0510  | 0.0118             | $10^{-11}$ M    | 0.2282   | 0.1266   | 0.1774  | 0.0508             |
| $10^{-10}$ M   | 0.0789   | −0.0055  | 0.0367  | 0.0422             | $10^{-10}$ M   | 0.0750   | 0.0480   | 0.0615  | 0.0135             | $10^{-10}$ M    | 0.2638   | 0.1464   | 0.2051  | 0.0587             |
| $10^{-9}$ M    | 0.0873   | −0.0037  | 0.0418  | 0.0455             | $10^{-9}$ M    | 0.0864   | 0.0558   | 0.0711  | 0.0153             | $10^{-9}$ M     | 0.2978   | 0.1631   | 0.2304  | 0.0674             |
| $10^{-8}$ M    | 0.0985   | −0.0005  | 0.0490  | 0.0495             | $10^{-8}$ M    | 0.0965   | 0.0633   | 0.0799  | 0.0166             | $10^{-8}$ M     | 0.3347   | 0.1857   | 0.2602  | 0.0745             |
| $10^{-7}$ M    | 0.1100   | −0.0001  | 0.0550  | 0.0551             | $10^{-7}$ M    | 0.1068   | 0.0765   | 0.0917  | 0.0151             | $10^{-7}$ M     | 0.3654   | 0.1979   | 0.2816  | 0.0837             |
| $10^{-6}$ M    | 0.1195   | 0.0023   | 0.0609  | 0.0586             | $10^{-6}$ M    | 0.1179   | 0.0839   | 0.1009  | 0.0170             | $10^{-6}$ M     | 0.4034   | 0.2153   | 0.3094  | 0.0940             |
| $10^{-5}$ M    | 0.1287   | 0.0066   | 0.0677  | 0.0611             | $10^{-5}$ M    | 0.1278   | 0.0911   | 0.1094  | 0.0183             | $10^{-5}$ M     | 0.4290   | 0.2257   | 0.3273  | 0.1017             |

  

| RW AZI         |          |          |         |                    | RW CLARI       |          |          |         |                    | RW ERIT         |          |          |         |                    |
|----------------|----------|----------|---------|--------------------|----------------|----------|----------|---------|--------------------|-----------------|----------|----------|---------|--------------------|
| Concentrations | Sensor 1 | Sensor 2 | Average | Standard Deviation | Concentrations | Sensor 1 | Sensor 2 | Average | Standard Deviation | Concentration s | Sensor 1 | Sensor 2 | Average | Standard Deviation |
| $10^{-15}$ M   | 0.0396   | 0.0213   | 0.0305  | 0.0091             | $10^{-15}$ M   | 0.0067   | 0.0014   | 0.0040  | 0.0026             | $10^{-15}$ M    | 0.0365   | 0.0107   | 0.0236  | 0.0129             |
| $10^{-14}$ M   | 0.0248   | 0.0282   | 0.0265  | 0.0017             | $10^{-14}$ M   | 0.0380   | 0.0035   | 0.0207  | 0.0172             | $10^{-14}$ M    | 0.0520   | 0.0191   | 0.0355  | 0.0165             |
| $10^{-13}$ M   | 0.0114   | 0.0275   | 0.0194  | 0.0081             | $10^{-13}$ M   | 0.0701   | 0.0059   | 0.0380  | 0.0321             | $10^{-13}$ M    | 0.0598   | 0.0215   | 0.0407  | 0.0192             |

| MW AZI       |        |        |        |        | MW CLARI     |        |        |        |        | MW ERIT      |        |        |        |        |
|--------------|--------|--------|--------|--------|--------------|--------|--------|--------|--------|--------------|--------|--------|--------|--------|
| $10^{-12}$ M | 0.0123 | 0.0274 | 0.0199 | 0.0075 | $10^{-12}$ M | 0.1441 | 0.0104 | 0.0773 | 0.0668 | $10^{-12}$ M | 0.0642 | 0.0243 | 0.0443 | 0.0200 |
| $10^{-11}$ M | 0.0154 | 0.0296 | 0.0225 | 0.0071 | $10^{-11}$ M | 0.1876 | 0.0131 | 0.1003 | 0.0873 | $10^{-11}$ M | 0.0685 | 0.0254 | 0.0470 | 0.0216 |
| $10^{-10}$ M | 0.0163 | 0.0310 | 0.0237 | 0.0073 | $10^{-10}$ M | 0.2149 | 0.0176 | 0.1163 | 0.0987 | $10^{-10}$ M | 0.0729 | 0.0283 | 0.0506 | 0.0223 |
| $10^{-9}$ M  | 0.0176 | 0.0330 | 0.0253 | 0.0077 | $10^{-9}$ M  | 0.2387 | 0.0215 | 0.1301 | 0.1086 | $10^{-9}$ M  | 0.0775 | 0.0273 | 0.0524 | 0.0251 |
| $10^{-8}$ M  | 0.0196 | 0.0343 | 0.0269 | 0.0073 | $10^{-8}$ M  | 0.2630 | 0.0302 | 0.1466 | 0.1164 | $10^{-8}$ M  | 0.0810 | 0.0279 | 0.0544 | 0.0265 |
| $10^{-7}$ M  | 0.0253 | 0.0358 | 0.0306 | 0.0053 | $10^{-7}$ M  | 0.2751 | 0.0341 | 0.1546 | 0.1205 | $10^{-7}$ M  | 0.0847 | 0.0329 | 0.0588 | 0.0259 |
| $10^{-6}$ M  | 0.0241 | 0.0371 | 0.0306 | 0.0065 | $10^{-6}$ M  | 0.2878 | 0.0375 | 0.1626 | 0.1252 | $10^{-6}$ M  | 0.0892 | 0.0422 | 0.0657 | 0.0235 |
| $10^{-5}$ M  | 0.0256 | 0.0390 | 0.0323 | 0.0067 | $10^{-5}$ M  | 0.3007 | 0.0404 | 0.1706 | 0.1302 | $10^{-5}$ M  | 0.0907 | 0.0377 | 0.0642 | 0.0265 |

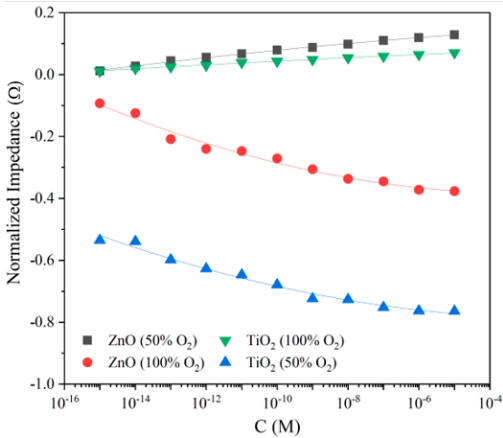

**Figure S1.** Normalized impedance as a function of azithromycin concentration in MW at fixed frequencies: 1, 1.58, 2.51 and  $2.51 \times 10^3$  Hz measured by the TiO<sub>2</sub> (100% O<sub>2</sub>) sensor, TiO<sub>2</sub> (50% O<sub>2</sub>) sensor, ZnO (100% O<sub>2</sub>) sensor, and ZnO (50% O<sub>2</sub>) sensor, respectively. To note that the percentage inside the parentheses correspond to the oxygen percentage used to reactive sputtered the corresponding metallic target.

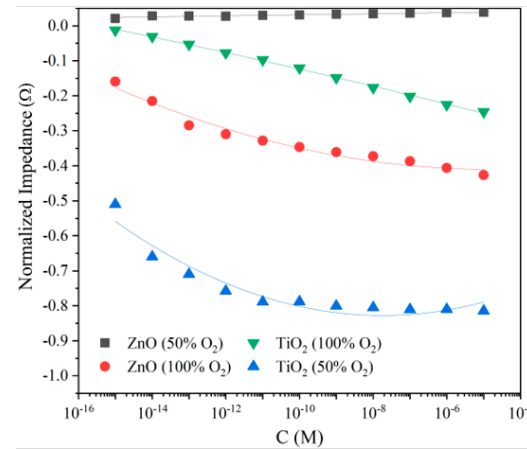

**Figure S2.** Normalized impedance as a function of azithromycin concentration in RW at fixed frequencies: 1, 1.58,  $3.98 \times 10^3$  and  $6.31 \times 10^4$  Hz measured by TiO<sub>2</sub> (50% O<sub>2</sub>) sensor, ZnO (100% O<sub>2</sub>) sensor, TiO<sub>2</sub> (100% O<sub>2</sub>) sensor, and ZnO (50% O<sub>2</sub>) sensor, respectively. To note that the percentage inside the parentheses correspond to the oxygen percentage used to reactive sputtered the corresponding metallic target.

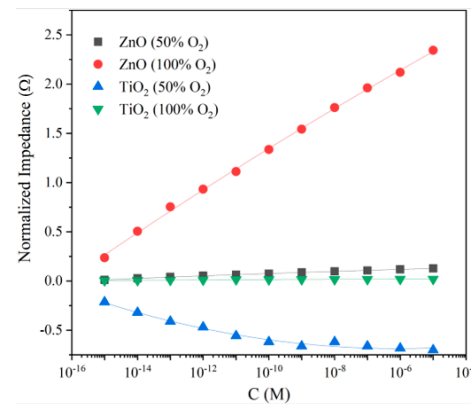

**Figure S3.** Normalized impedance as a function of clarithromycin concentration in MW at fixed frequencies: 1, 1, 2.51, 2.51 Hz measured by the TiO<sub>2</sub> (50% O<sub>2</sub>) sensor, TiO<sub>2</sub> (100% O<sub>2</sub>) sensor, ZnO (50% O<sub>2</sub>) sensor and ZnO (100% O<sub>2</sub>) sensor, respectively. To note that the percentage inside the parentheses correspond to the oxygen percentage used to reactive sputtered the corresponding metallic target.

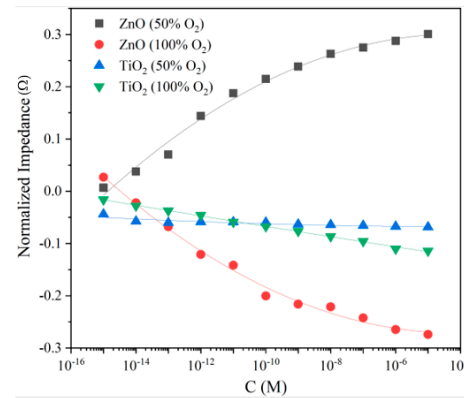

**Figure S4.** Normalized impedance as a function of clarithromycin concentration in RW at fixed frequencies: 1,  $3.98 \times 10^2$ ,  $2.51 \times 10^3$  and  $10^6$  Hz measured by the ZnO (100% O<sub>2</sub>) sensor, ZnO (50% O<sub>2</sub>) sensor, TiO<sub>2</sub> (100% O<sub>2</sub>) sensor, and TiO<sub>2</sub> (50% O<sub>2</sub>) sensor, respectively. To note that the percentage inside the parentheses correspond to the oxygen percentage used to reactive sputtered the corresponding metallic target.

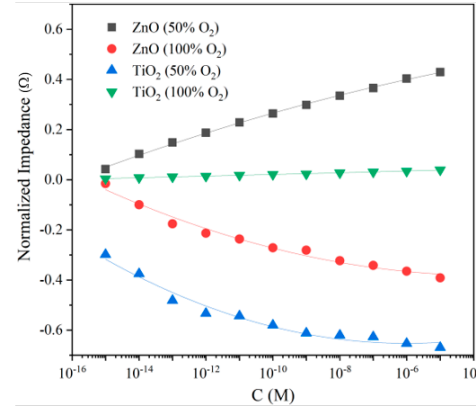

**Figure S5.** Normalized impedance as a function of erythromycin concentration in MW at fixed frequencies: 1,  $1.58 \times 10^2$  and  $2.51 \times 10^3$  Hz measured by the TiO<sub>2</sub> (50% O<sub>2</sub>) sensor, ZnO (50% O<sub>2</sub>) sensor, ZnO (100% O<sub>2</sub>), TiO<sub>2</sub> (100% O<sub>2</sub>) sensor, respectively. To note that the percentage inside the parentheses correspond to the oxygen percentage used to reactive sputtered the corresponding metallic target.

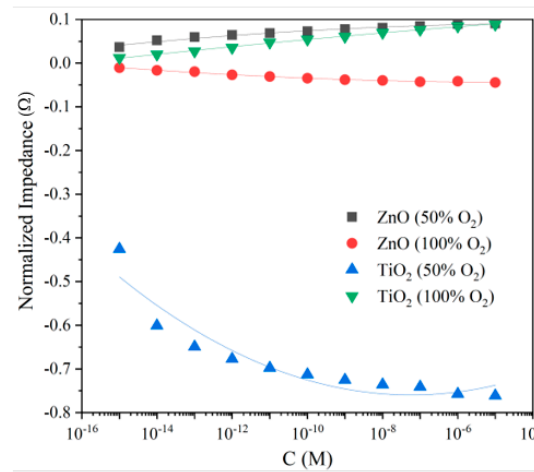

**Figure S6.** Normalized impedance as a function of erythromycin concentration in RW at fixed frequencies: 1, 10,  $2.51 \times 10^4$  and  $10^6$  Hz measured by the TiO<sub>2</sub> (50% O<sub>2</sub>), TiO<sub>2</sub> (100% O<sub>2</sub>) sensor, ZnO (50% O<sub>2</sub>) sensor, and ZnO (100% O<sub>2</sub>) sensor, respectively. To note that the percentage inside the parentheses correspond to the oxygen percentage used to reactive sputtered the corresponding metallic target.

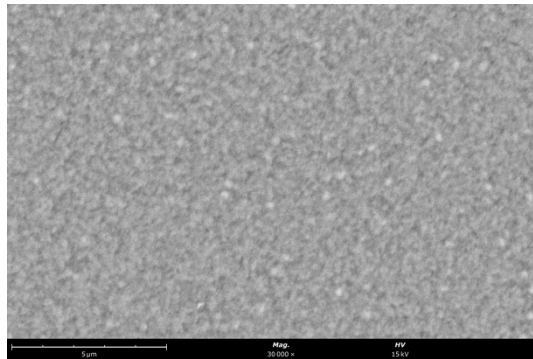

(a) ZnO film deposited with 50% O<sub>2</sub>

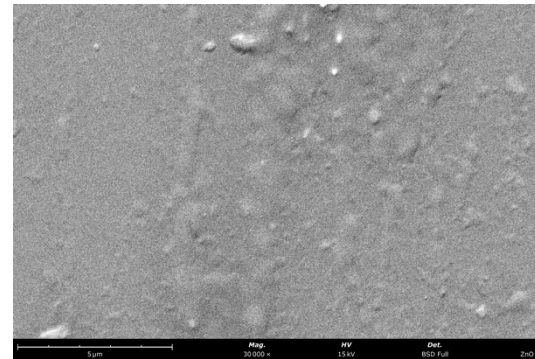

(b) ZnO film deposited with 100% O<sub>2</sub>

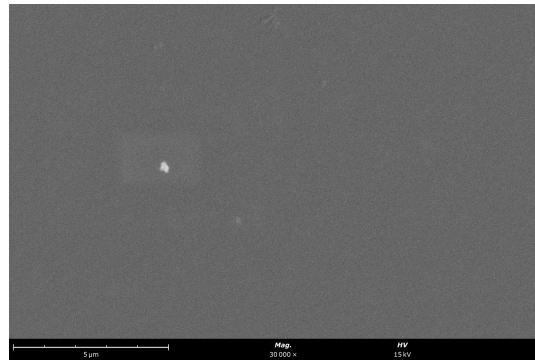

(c) TiO<sub>2</sub> film deposited with 50% O<sub>2</sub>

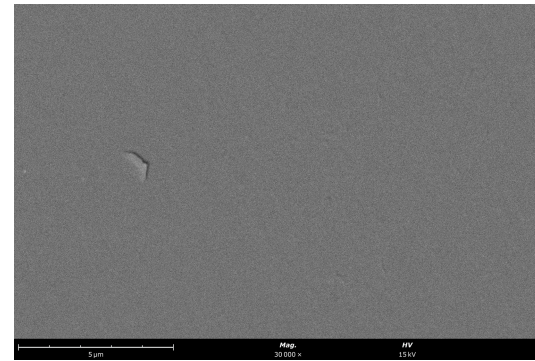

(d) TiO<sub>2</sub> film deposited with 100% O<sub>2</sub>

**Figure S7.** SEM images with 30,000 times magnification for (a) ZnO 50%; (b) ZnO 100%; (c) TiO<sub>2</sub> 50%; (d) TiO<sub>2</sub> 100% (scale bar size: 5 μm).
